# Supplementary material
Source: publisher figshare collection journal article supplement (https://asha.figshare.com/ndownloader/files/37974234)
Supplement: Supplementary file 1 [file 37974234]

**Supplemental Material S1.** Results of one-sample *t* tests by vocabulary size and lexical category.

| Vocabulary Size and Lexical Category | <i>t</i> value   | <i>df</i> | <i>p</i> value <sup>a</sup> |
|--------------------------------------|------------------|-----------|-----------------------------|
| <i>1-5 Words</i>                     |                  |           |                             |
| Social Words                         | -0.102           | 17        | .920                        |
| Common Nouns                         | -0.209           | 17        | .837                        |
| Predicates                           | 0.299            | 17        | .769                        |
| Closed-Class Words                   | 0.280            | 17        | .783                        |
| <i>6-10 Words</i>                    |                  |           |                             |
| Social Words                         | -1.607           | 8         | .147                        |
| Common Nouns                         | 1.375            | 8         | .207                        |
| Predicates                           | 0.347            | 8         | .738                        |
| Closed-Class Words                   | 0.370            | 8         | .721                        |
| <i>11-20 Words</i>                   |                  |           |                             |
| Social Words                         | 1.704            | 6         | .139                        |
| Common Nouns                         | -0.815           | 6         | .446                        |
| Predicates                           | -1.815           | 6         | .119                        |
| Closed-Class Words                   | n/a <sup>b</sup> | n/a       | n/a                         |
| <i>21-50 words</i>                   |                  |           |                             |
| Social Words                         | 1.855            | 14        | .085                        |
| Common Nouns                         | 0.496            | 14        | .628                        |
| Predicates                           | -1.367           | 14        | .193                        |
| Closed-Class Words                   | -3.391           | 14        | .004                        |
| <i>&gt;50 Words</i>                  |                  |           |                             |
| Social Words                         | -0.632           | 27        | .533                        |
| Common Nouns                         | 1.662            | 27        | .108                        |
| Predicates                           | 0.892            | 27        | .380                        |
| Closed-Class Words                   | 0.053            | 27        | .958                        |

<sup>a</sup>The significance level for *p* values was set at .0025 (.05/20) due to the Bonferroni correction. No comparisons reached the significant level. <sup>b</sup>The *t* test cannot be performed because no children at this vocabulary level produced closed-class words in our sample and there was no standard deviation.
